# Supplementary material
Source: publisher figshare collection journal article supplement (https://frontiersin.figshare.com/ndownloader/files/12268883)
Supplement: Supplementary file 1 [file 12268883]

Supplementary Table 1. Significant pairwise comparisons comparing swallowing pressure variability at different alignments. CV = coefficient of variability; VP = velopharynx; TB = tongue base; HP = hypopharynx; UES = upper esophageal sphincter.

| Alignment Type | Alignment Region | Total CV Mean ± Standard Error | Significant pairwise comparisons (p < 0.05) |
| --- | --- | --- | --- |
| Pressure Onset | Velopharynx | 274.5 ± 14.9 | > TB onset, HP onset, UES onset, VP maximum, VP half-maximum |
| Tongue Base | 232.1 ± 9.6 | < VP onset  > HP onset |
| Hypopharynx | 208.9 ± 8.5 | < VP onset, TB onset, UES onset  > HP half-maximum |
| UES | 219.8 ± 7.9 | < VP onset  > HP onset |
| Pressure Maximum | Velopharynx | 228.1 ± 9.0 | < VP onset, VP half-maximum, VP peak 1st derivative  > HP maximum |
| Tongue Base | 235.5 ± 9.5 | > HP maximum |
| Hypopharynx | 206.0 ± 9.5 | < VP maximum, HP maximum, UES maximum |
| UES | 228.3 ± 9.6 | > HP maximum, UES half-maximum |
| Half of Maximum Pressure | Velopharynx | 251.8 ± 14.0 | > TB half-maximum, HP half-maximum, UES half-maximum, VP maximum  < VP onset |
| Tongue Base | 225.6 ± 9.4 | < VP half-maximum, TB peak 1st derivative  > HP half-maximum, UES half-maximum |
| Hypopharynx | 200.0 ± 8.6 | < VP half-maximum, TB half-maximum, HP onset, HP peak 1st derivative |
| UES | 205.6 ± 8.6 | < VP half-maximum, TB half-maximum, UES onset, UES maximum, UES peak 1st derivative |
| Peak 1st Derivative | Velopharynx | 253.3 ± 12.1 | > HP peak 1st derivative, UES peak 1st derivative, VP peak |
| Tongue Base | 242.7 ± 10.1 | > HP peak 1st derivative, UES peak 1st derivative, TB half-maximum |
| Hypopharynx | 207.4 ± 8.3 | < VP peak 1st derivative, TB peak 1st derivative  > HP half-maximum |
| UES | 216.6 ± 8.7 | < VP peak 1st derivative, TB peak 1st derivative  > UES half-maximum |
